# Supplementary material
Source: publisher figshare collection journal article supplement (https://asha.figshare.com/articles/dataset/_/10093403)
Supplement: Supplementary file 1 [file 1]

**Supplemental Material S3.** Developmental Sentence Scoring (DSS) results.

**Table S3.1**

*DSS Results for Sam*

| Sentence                                 | Ind. Pro |   | Pers. Pro |   |  | Main Verb |  | Sec. Verb | Neg | Conj | Inter. Rev | Wh-Q | Sentence point | Total |
|------------------------------------------|----------|---|-----------|---|--|-----------|--|-----------|-----|------|------------|------|----------------|-------|
| C <what/'s this>?                        | 1        |   |           |   |  | 1         |  |           |     |      | 1          | 2    | 1              | 6     |
| C Can you take them off?                 |          |   | 2         | 3 |  | 4         |  |           |     |      | 6          |      | 1              | 16    |
| C What *does this one look/3s like [EU]? | 1        | 3 |           |   |  | /         |  |           |     |      |            | 2    | 0              | 6     |
| C Look at this.                          | 1        |   |           |   |  | 1         |  |           |     |      |            |      | 1              | 3     |
| C I do. {g= I do need help}              |          |   | 1         |   |  | inc       |  |           |     |      |            |      | 1              | 2     |
| C He go [EW:went].                       |          |   | 2         |   |  | /         |  |           |     |      |            |      | 0              | 2     |
| C He/'s in here.                         |          |   | 2         |   |  | 1         |  |           |     |      |            |      | 1              | 4     |
| C (um) I don't know.                     |          |   | 1         |   |  | 4         |  |           | 4   |      |            |      | 1              | 10    |
| C He make/3s sound/s.                    |          |   | 2         |   |  | 2         |  |           |     |      |            |      | 1              | 5     |
| C He/'s the farmer.                      |          |   | 2         |   |  | 1         |  |           |     |      |            |      | 1              | 4     |
| C What game will *we play?               |          |   | /         |   |  | 4         |  |           |     |      |            | 2    | 0              | 6     |
| C You have the piggy one!                | 3        |   | 1         |   |  | 1         |  |           |     |      |            |      | 1              | 6     |
| C Oh they go on your hand/s!             |          |   | 3         | 1 |  | 1         |  |           |     |      |            |      | 1              | 6     |
| C Wear this one.                         | 1        | 3 |           |   |  | 1         |  |           |     |      |            |      | 1              | 6     |
| C (Can) can you put two on?              | 3        |   | 1         |   |  | 4         |  |           |     |      | 6          |      | 1              | 15    |
| C This is the dragon.                    | 1        |   |           |   |  | 1         |  |           |     |      |            |      | 1              | 3     |
| C It/'s hard to put in[EW:on].           | 1        |   |           |   |  | 1         |  | 3         |     |      |            |      | 0              | 5     |
| C I can do it.                           | 1        |   | 1         |   |  | 4         |  |           |     |      |            |      | 1              | 7     |
| C Could you put it in?                   | 1        |   | 1         |   |  | 6         |  |           |     |      | 6          |      | 1              | 15    |
| C Let/'s do all of them.                 | 3        |   | 3         |   |  | 1         |  | 2         |     |      |            |      | 1              | 10    |
| C I can/'t.                              |          |   | 1         |   |  | inc       |  |           | 4   |      |            |      | 1              | 6     |
| C You want to get it out?                | 1        |   | 1         |   |  | /         |  | 2         |     |      | /          |      | 0              | 4     |

**Table S3.2**

*DSS Results for Julia*

| Sentence                                                                                    | Ind. Pro |   |   | Pers. Pro |   |   | Main Verb |   |   | Sec. Verb | Neg | Conj |  |   | Inter. Rev | Wh-Q | Sentence point | Total |
|---------------------------------------------------------------------------------------------|----------|---|---|-----------|---|---|-----------|---|---|-----------|-----|------|--|---|------------|------|----------------|-------|
| C The pig has mud on his feet.                                                              |          |   |   | 2         |   |   | 2         |   |   |           |     |      |  |   |            |      | 1              | 5     |
| C Oh there *is where the horse go/3s.                                                       |          |   |   |           |   |   | /         | 2 |   |           |     |      |  |   |            |      | 0              | 2     |
| C And (sometime um) whenever it/'s time for us to put them in bed we put the horse in here. | 1        |   |   | 3         | 3 | 3 | 1         | 1 |   | 3         |     |      |  | 8 |            |      | 1              | 24    |
| C So it *will be soft.                                                                      | 1        |   |   |           |   |   | /         |   |   |           |     |      |  |   |            |      | 1              | 2     |
| C So where should we put the goat?                                                          |          |   |   | 3         |   |   | 6         |   |   |           |     |      |  |   | 6          | 2    | 1              | 18    |
| C Where do the pig go/3s [EU]?                                                              |          |   |   |           |   |   | /         |   |   |           |     |      |  |   | /          | 2    | 0              | 2     |
| C How about the sheep go/3s over here?                                                      |          |   |   |           |   |   | 2         |   |   |           |     |      |  |   |            | 7    | 1              | 10    |
| C <(Where)> where can (um) this go?                                                         | 1        |   |   |           |   |   | 4         |   |   |           |     |      |  |   | 6          | 2    | 1              | 14    |
| C Up there is where them[EW:they] sleep and down here is where he eat/3s.                   |          |   |   | /         | 2 |   | 1         | 1 | 2 |           |     | 3    |  |   |            |      | 0              | 9     |
| C How can this fit in there?                                                                | 1        |   |   |           |   |   | 4         |   |   |           |     |      |  |   | 6          | 5    | 1              | 17    |
| C Let/'s put this away.                                                                     | 1        |   |   |           |   |   | 1         |   |   | 2         |     |      |  |   |            |      | 1              | 5     |
| C Because I saw them.                                                                       |          |   |   | 1         | 3 |   | 2         |   |   |           |     |      |  |   |            |      | 1              | 7     |
| C Let me be these. (Command to clinician)                                                   | 1        |   |   | 3         |   |   | 1         |   |   | 2         |     |      |  |   |            |      | 1              | 8     |
| C Let/'s be these.                                                                          |          |   |   | 3         |   |   | 1         |   |   | 2         |     |      |  |   |            |      | 1              | 7     |
| C How about you be this?                                                                    | 1        |   |   | 1         |   |   | 1         |   |   |           |     |      |  |   |            | 7    | 1              | 11    |
| C And how about this dragon be in this (sl*) show whenever it/'s almost done?               | 1        | 1 | 1 |           |   |   | /         | 1 |   |           |     | 8    |  |   |            | 7    | 0              | 19    |

| Sentence                             | Ind. Pro |   |  | Pers. Pro |  |  | Main Verb |  |  | Sec. Verb | Neg | Conj |  |  | Inter. Rev | Wh-Q | Sentence point | Total |
|--------------------------------------|----------|---|--|-----------|--|--|-----------|--|--|-----------|-----|------|--|--|------------|------|----------------|-------|
| C we need here.                      |          |   |  | 3         |  |  | 1         |  |  |           |     |      |  |  |            |      | 0              | 4     |
| C How will we get this one on?       | 1        | 3 |  | 3         |  |  | 4         |  |  |           |     |      |  |  | 6          |      | 0              | 17    |
| C Oh the queen is here too.          |          |   |  |           |  |  | 1         |  |  |           |     |      |  |  |            |      | 1              | 2     |
| C Ah I can/'t put this on.           | 1        |   |  | 1         |  |  | 4         |  |  |           | 4   |      |  |  |            |      | 1              | 11    |
| C The (Qu*) king telled[EO:told] me. |          |   |  | 1         |  |  | /         |  |  |           |     |      |  |  |            |      | 1              | 2     |
| C (Uh um) how about we lock it up?   | 1        |   |  | 3         |  |  | 1         |  |  |           |     |      |  |  |            | 7    | 1              | 13    |

*Note.* C denotes a child utterance. SALT coding conventions are shown. DSS categories are: indefinite pronouns, personal pronouns, main verbs, secondary verbs, negatives, conjunctions, interrogative reversals, and wh- questions. Slashes (/) indicate attempted structures. "Inc." stands for incomplete and means that the child elided (appropriately) a part of the main verb.
